# Supplementary material
Source: publisher figshare collection journal article supplement (https://tandf.figshare.com/ndownloader/files/14553251)
Supplement: Supplementary file 1 [file 14553251]

Table B1. Results for Small-Sized Problems

Table B2. Results for Medium-Sized Problems

Table B3. Results for Large-Sized Problems

Table C1. CPU Time Results for Small-Sized Problems

Table C2. CPU Time Results for Medium-Sized Problems

Table C3. CPU Time Results for Large-Sized Problems
